# Supplementary material for: In situ FTIR spectroscopy study to reveal Ga-modified ZSM-5 for boosting isobutene amination
Source: Royal Society of Chemistry journal article supplement (doi:10.1039/d2re00055e), 2022-01-01
Supplement: d2re00055e1.pdf [file d2re00055e1.pdf]

## Supplementary Information

### **In situ FTIR spectroscopy study to reveal Ga modified ZSM-5 for boosting isobutene amination**

Shiqing Wang, Xiaocheng Lan, Shiyong Xing, Babar Ali, and Tiefeng Wang\*

Beijing Key Laboratory of Green Reaction Engineering and Technology

Department of Chemical Engineering, Tsinghua University, Beijing 100084, China

\* Corresponding Author: Tel.: 86-10-62794132.

E-mail: wangtf@tsinghua.edu.cn (T. F. Wang)

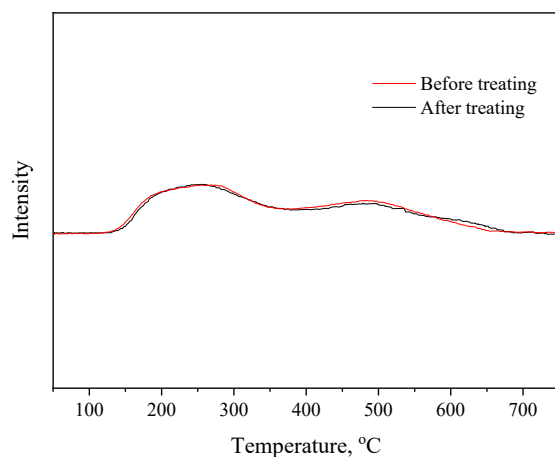

**Fig. S1** NH<sub>3</sub>-TPD

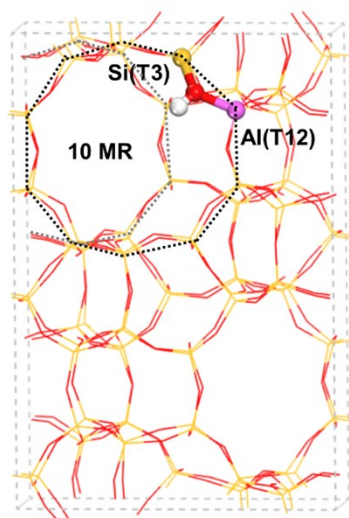

| Framework          | ZSM-5                             |
|--------------------|-----------------------------------|
| Formal composition | Si <sub>96</sub> O <sub>192</sub> |
| Acid site          | Al(T12)-OH-Si(T3)                 |
| Ring sizes         | 10-ring                           |
| Pore size          | 5.3 × 5.6 Å                       |
| Si/Al ratio        | 95                                |

**Fig. S2** Geometry structures of H-ZSM-5 for DFT calculation. Yellow: silicon; red: oxygen; purple: aluminum; white: hydrogen; gray: carbon. 10 MR means 10-membered-ring. T represents the tetrahedral Si and Al atom.

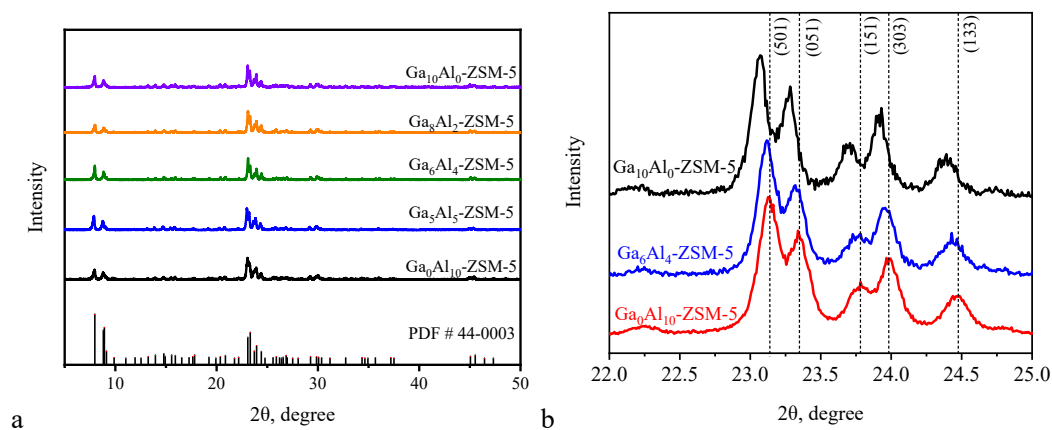

**Fig. S3** (a) XRD patterns of the catalysts. (b) XRD patterns of Ga<sub>10</sub>Al<sub>0</sub>-ZSM-5, Ga<sub>6</sub>Al<sub>4</sub>-ZSM-5, and Ga<sub>0</sub>Al<sub>10</sub>-ZSM-5 in 2θ range of 22°-25°.

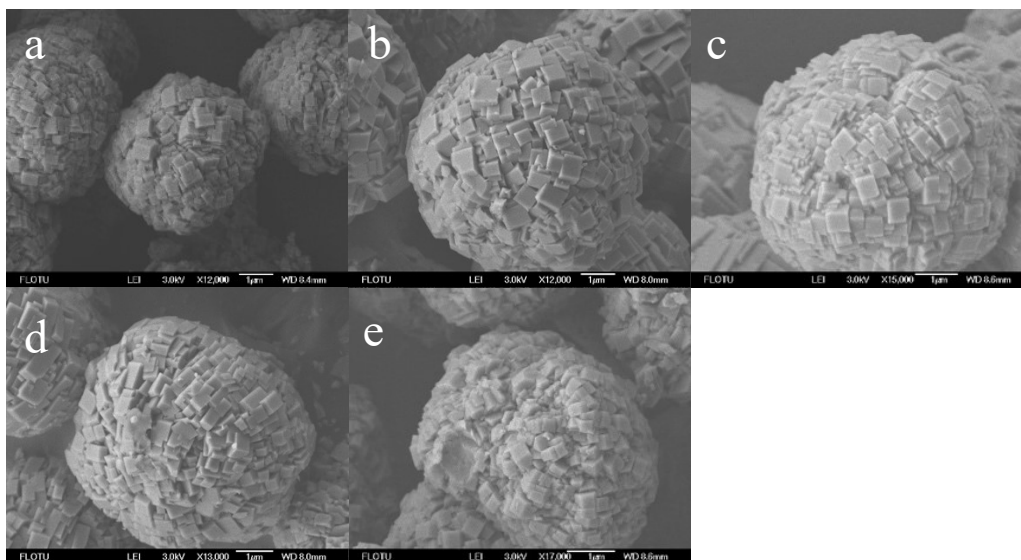

**Fig. S4** SEM images of  $\text{Ga}_x\text{Al}_y\text{-ZSM-5}$  catalysts. (a)  $\text{Ga}_0\text{Al}_{10}\text{-ZSM-5}$ . (b)  $\text{Ga}_5\text{Al}_5\text{-ZSM-5}$ . (c)  $\text{Ga}_6\text{Al}_4\text{-ZSM-5}$ . (d)  $\text{Ga}_8\text{Al}_2\text{-ZSM-5}$ . (e)  $\text{Ga}_{10}\text{Al}_0\text{-ZSM-5}$ .

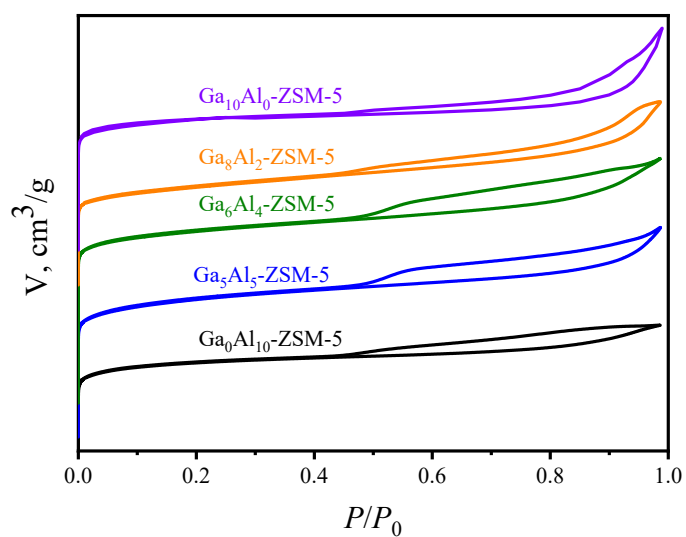

**Fig. S5**  $\text{N}_2$  adsorption-desorption isotherms of the catalysts.

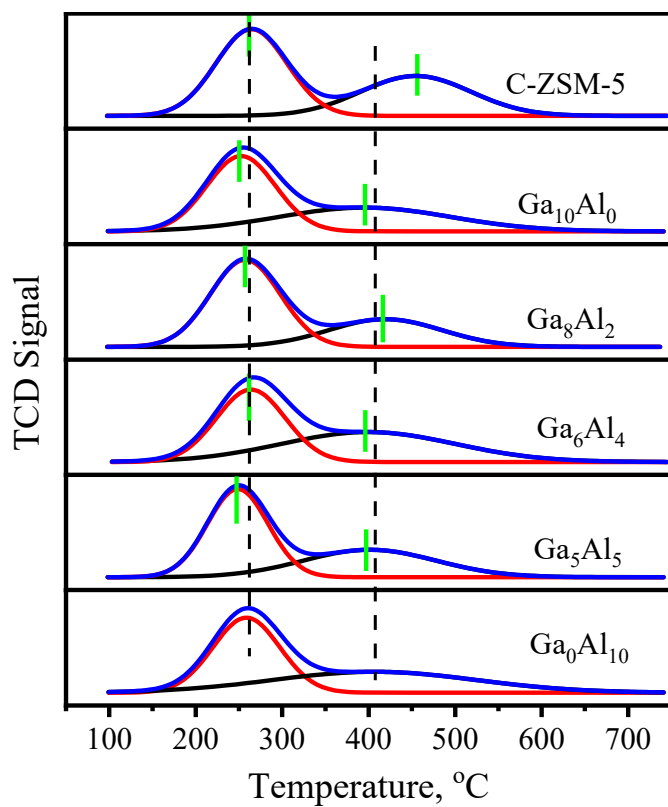

Fig. S6 NH<sub>3</sub>-TPD profiles of the catalysts.

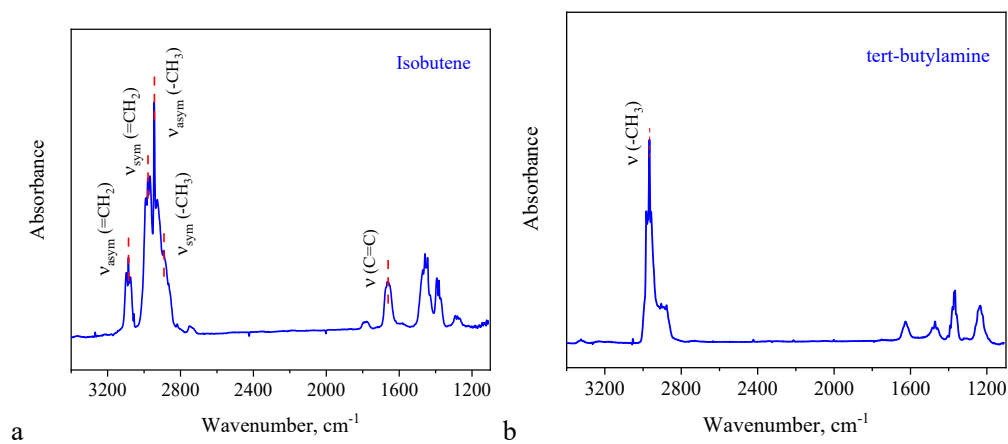

Fig. S7 IR spectra of the gas phase chemicals and corresponding vibration.

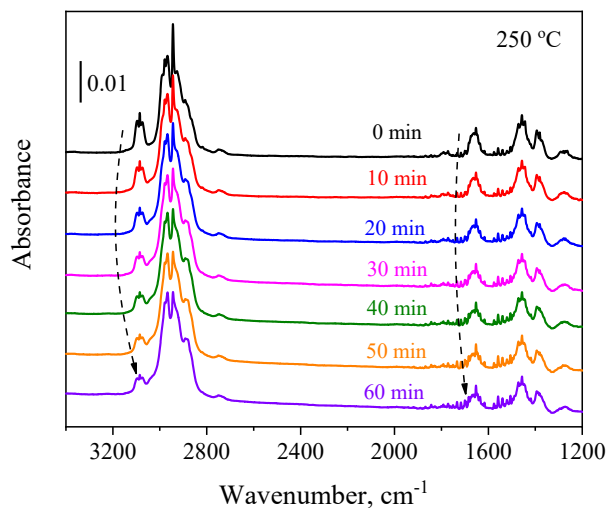

**Fig. S8** Evolution of in situ FTIR spectra for isobutene protonation over  $\text{Ga}_6\text{Al}_4\text{-ZSM-5}$ .

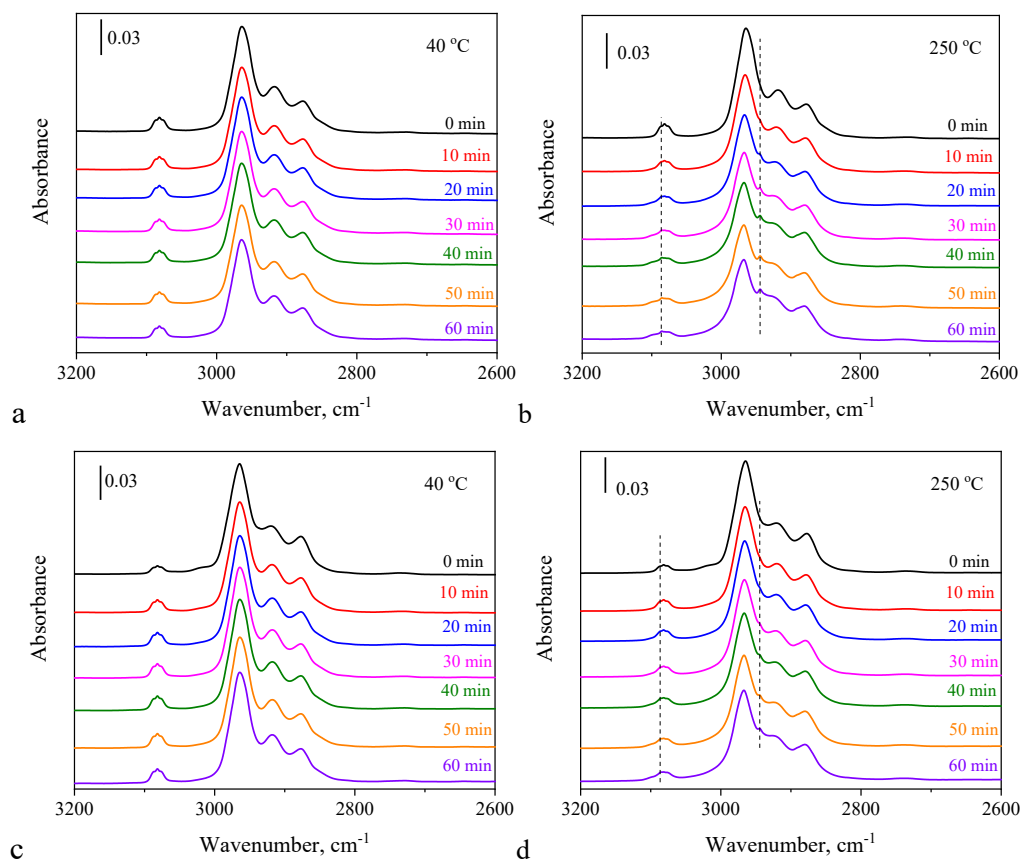

**Fig. S9** Dynamic changes of in situ FTIR spectra for the chemicals over  $\text{Ga}_6\text{Al}_4\text{-ZSM-5}$ . (a) 2,4,4-trimethyl-1-pentene at 40 °C. (b) 2,4,4-trimethyl-1-pentene at 250 °C. (c) 2,4,4-trimethyl-2-pentene at 40 °C. (d) 2,4,4-trimethyl-2-pentene at 250 °C.

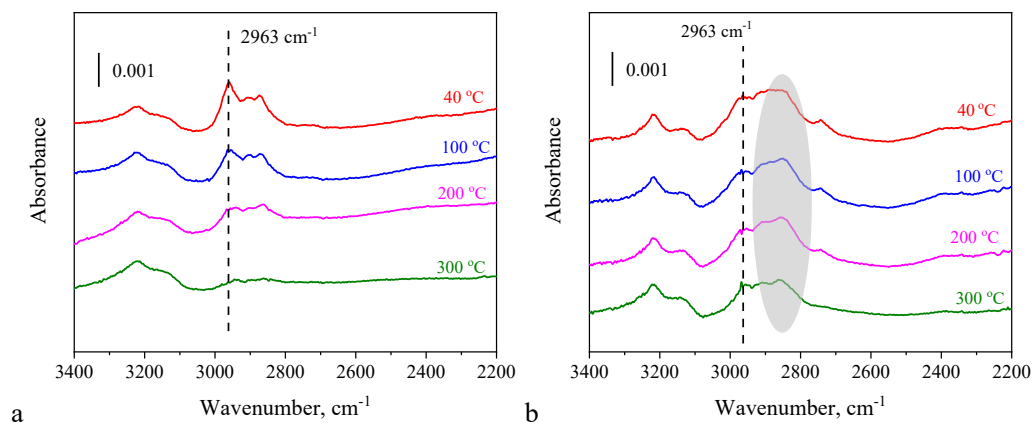

**Fig. S10 Desorption of surface species over Ga<sub>6</sub>Al<sub>4</sub>-ZSM-5. (a)** after in situ FTIR experiment of C8-1 at 40 °C. **(b)** after in situ FTIR experiment of C8-1 at 250 °C.

After in situ FTIR experiment of C8-1 for 60 min (as shown in **Fig. S9**), the temperature of the catalyst was first set to 40 °C and then the IR cell was evacuated by a turbo pump to remove the gas phase. With the pressure decreasing to  $5 \times 10^{-3}$  Pa, IR was collected as the spectrum of 40 °C. After that, the temperature of the catalyst was set to desired value ( $T$ ) and kept for 1 min and then was set back to 40 °C to collect the IR spectra of  $T$ .

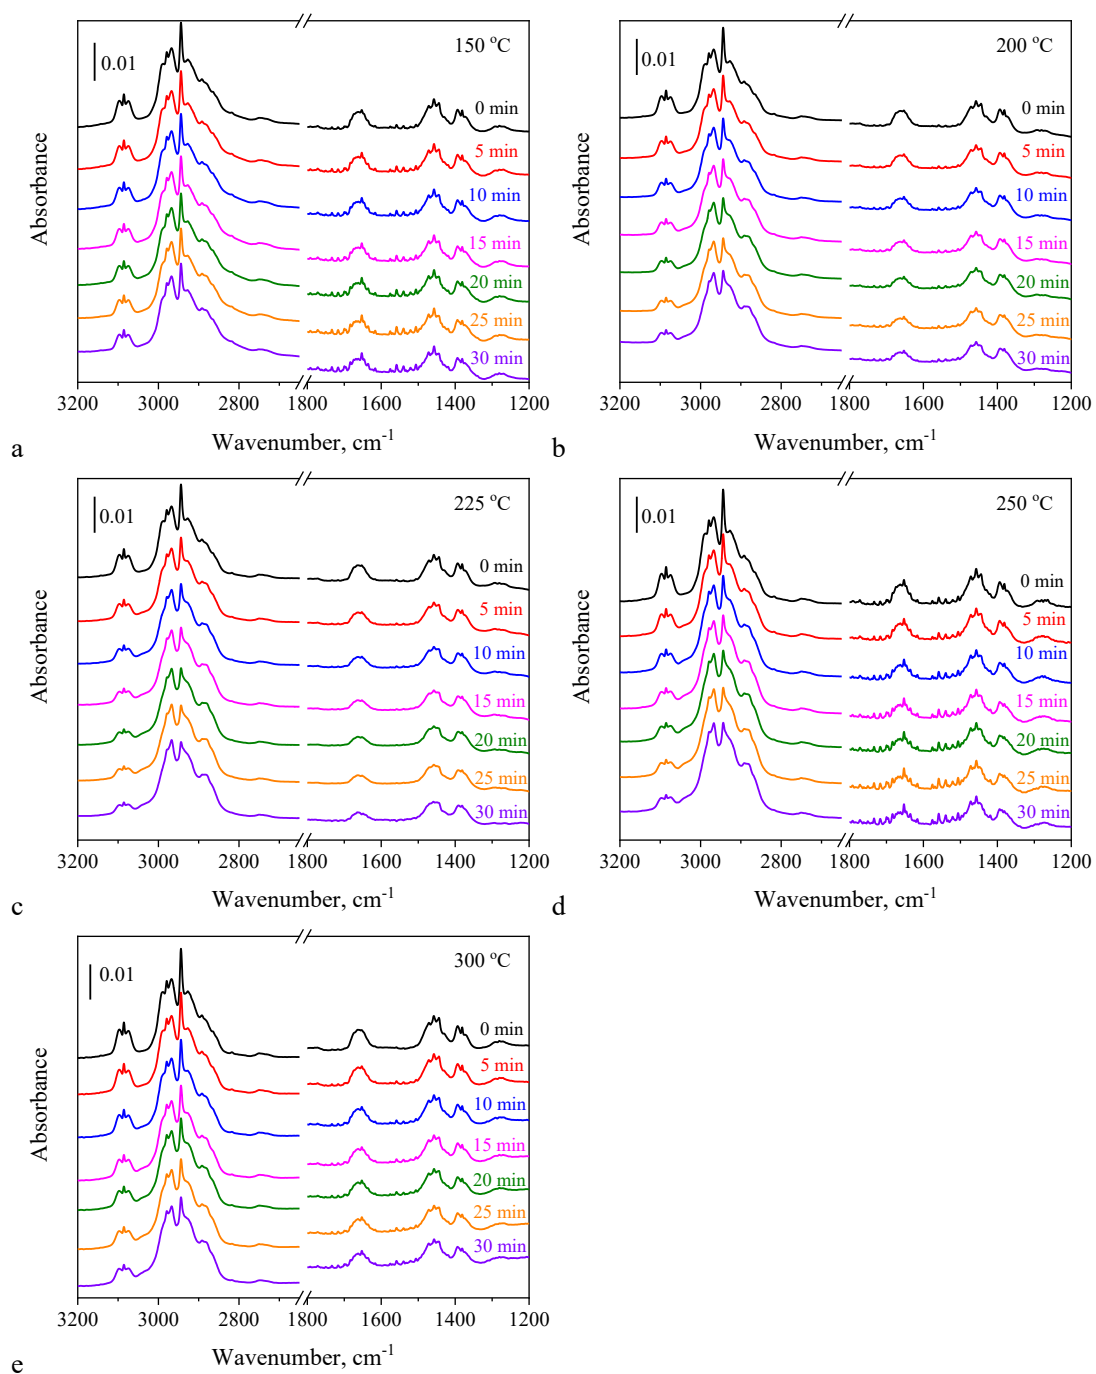

**Fig. S11** In situ FTIR spectra of isobutene protonation over  $\text{Ga}_6\text{Al}_4\text{-ZSM-5}$  at different temperature. (a) 150 °C. (b) 200 °C. (c) 225 °C. (d) 250 °C. (e) 300 °C.

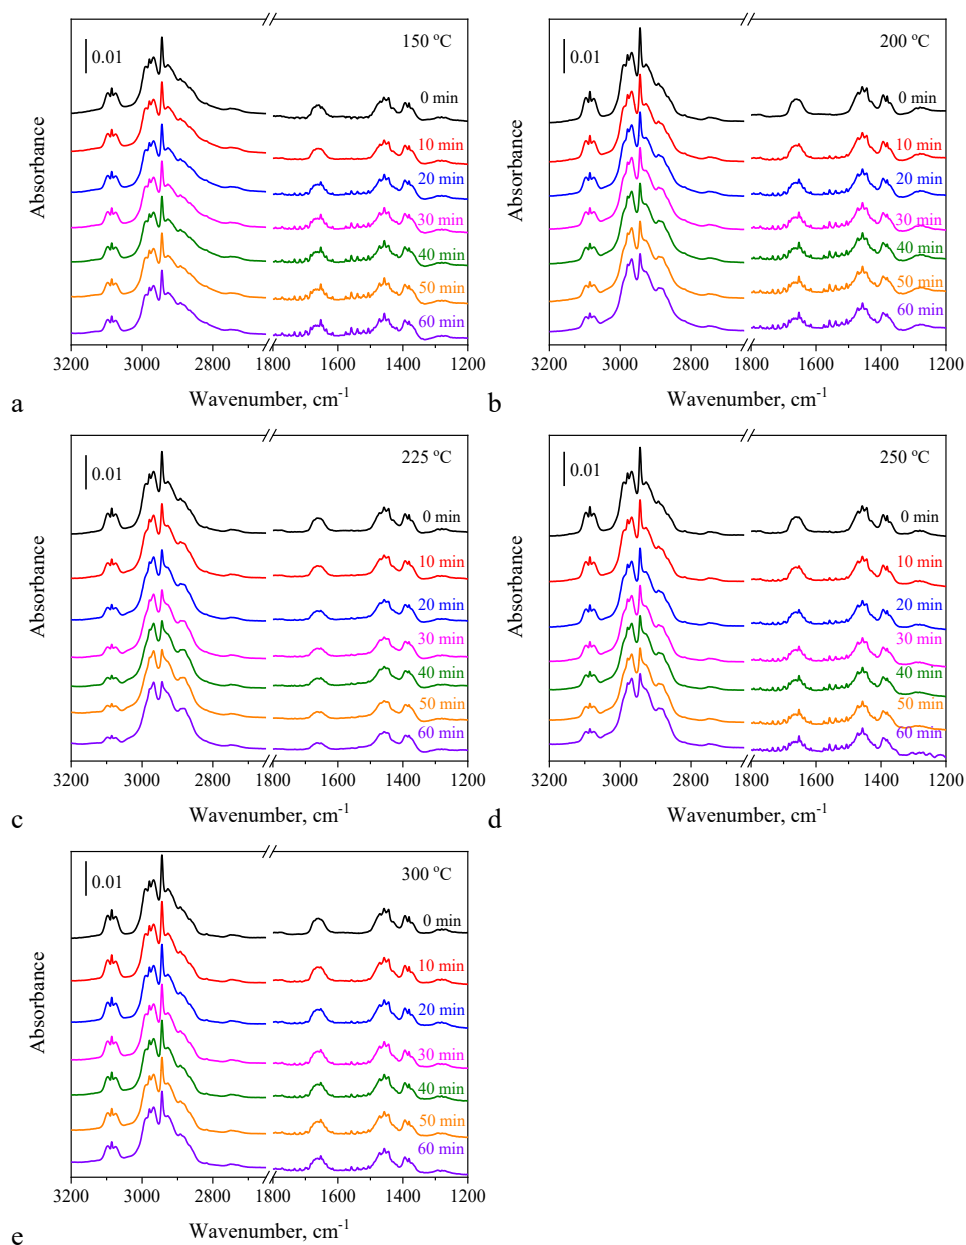

**Fig. S12** In situ FTIR spectra of isobutene protonation over  $\text{Ga}_{10}\text{Al}_0\text{-ZSM-5}$  at different temperature. (a) 150 °C. (b) 200 °C. (c) 225 °C. (d) 250 °C. (e) 300 °C.



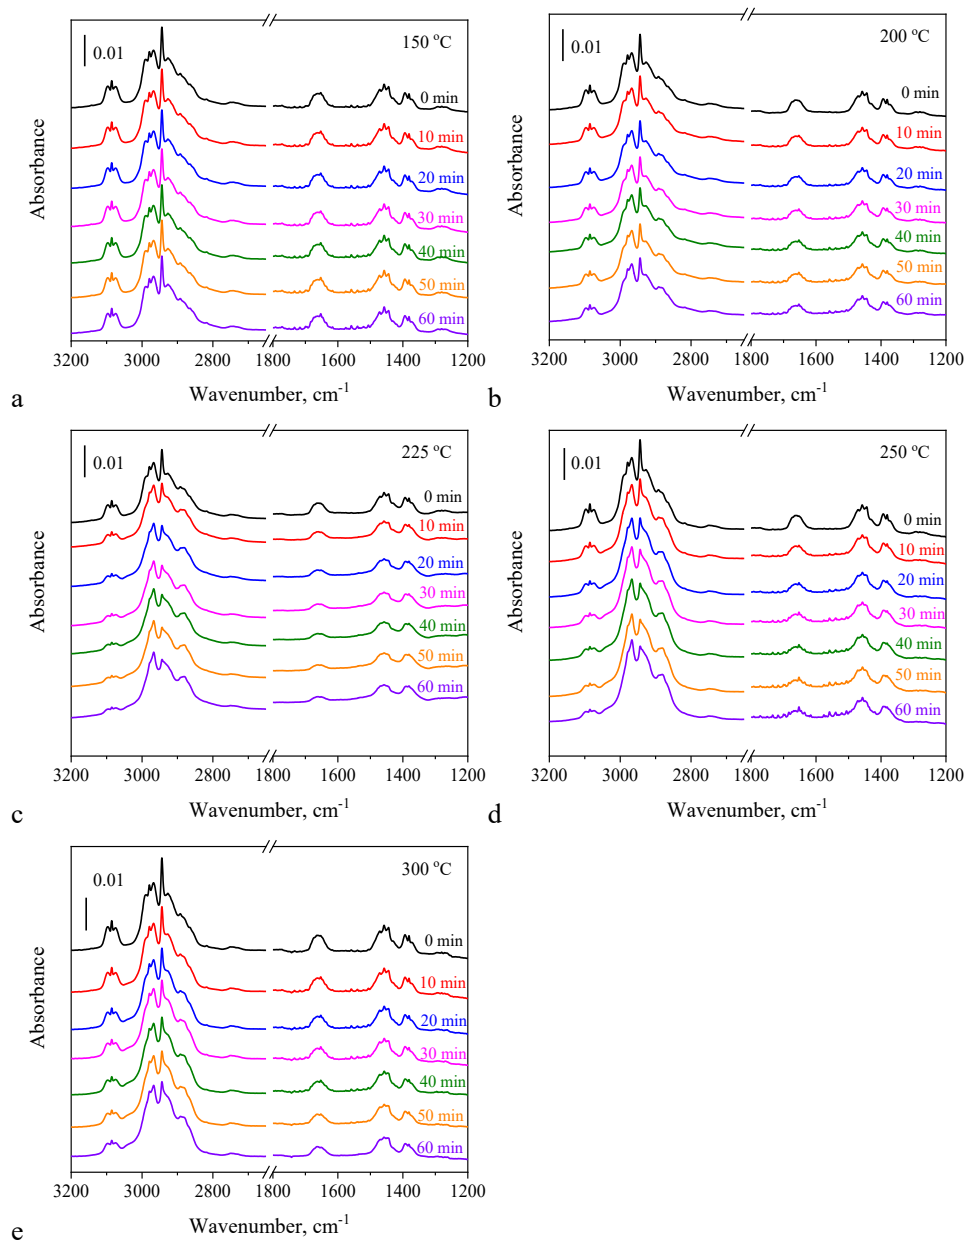

**Fig. S13** In situ FTIR spectra of isobutene protonation over  $\text{Ga}_0\text{Al}_{10}\text{-ZSM-5}$  at different temperature. (a) 150 °C. (b) 200 °C. (c) 225 °C. (d) 250 °C. (e) 300 °C.

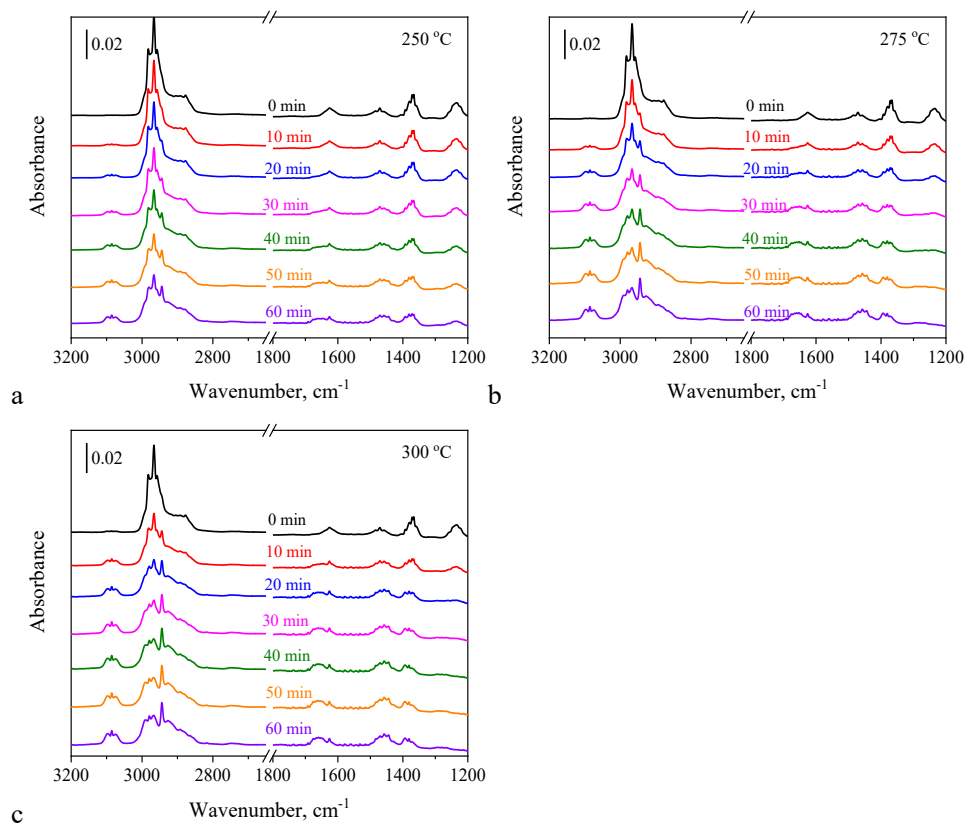

**Fig. S14** In situ FTIR spectra of Hoffman elimination over Ga<sub>6</sub>Al<sub>4</sub>-ZSM-5 at different temperature. (a) 250 °C. (b) 275 °C. (c) 300 °C.

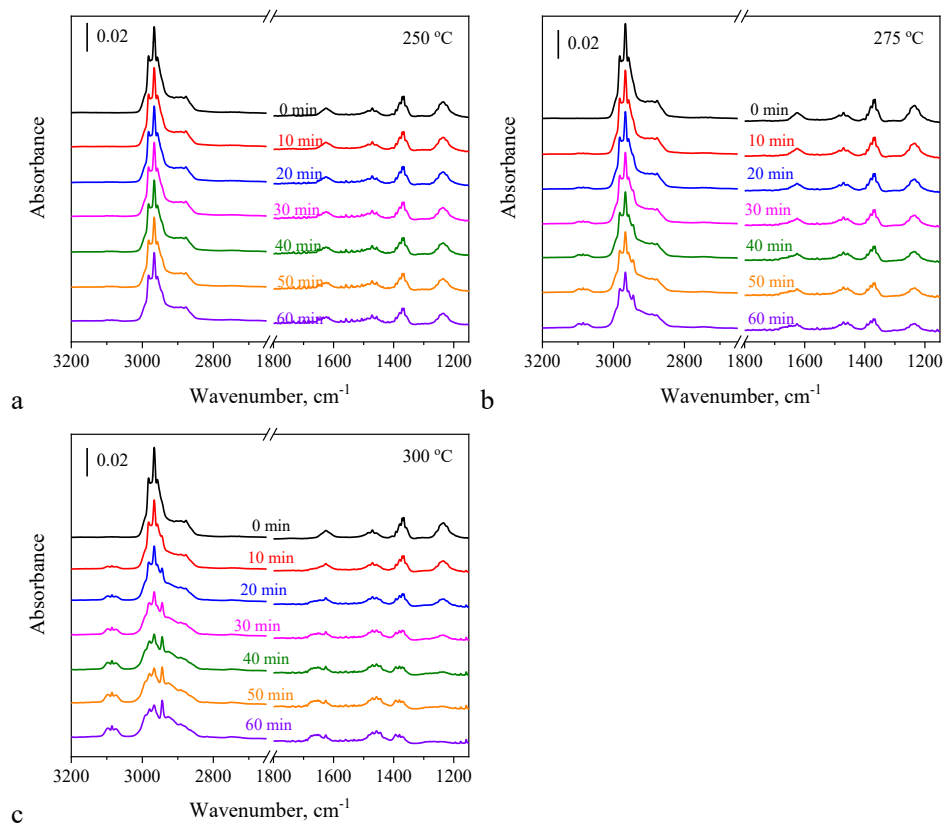

**Fig. S15** In situ FTIR spectra of Hoffman elimination over Ga<sub>10</sub>Al<sub>0</sub>-ZSM-5 at different temperature. (a) 250 °C. (b) 275 °C. (c) 300 °C.

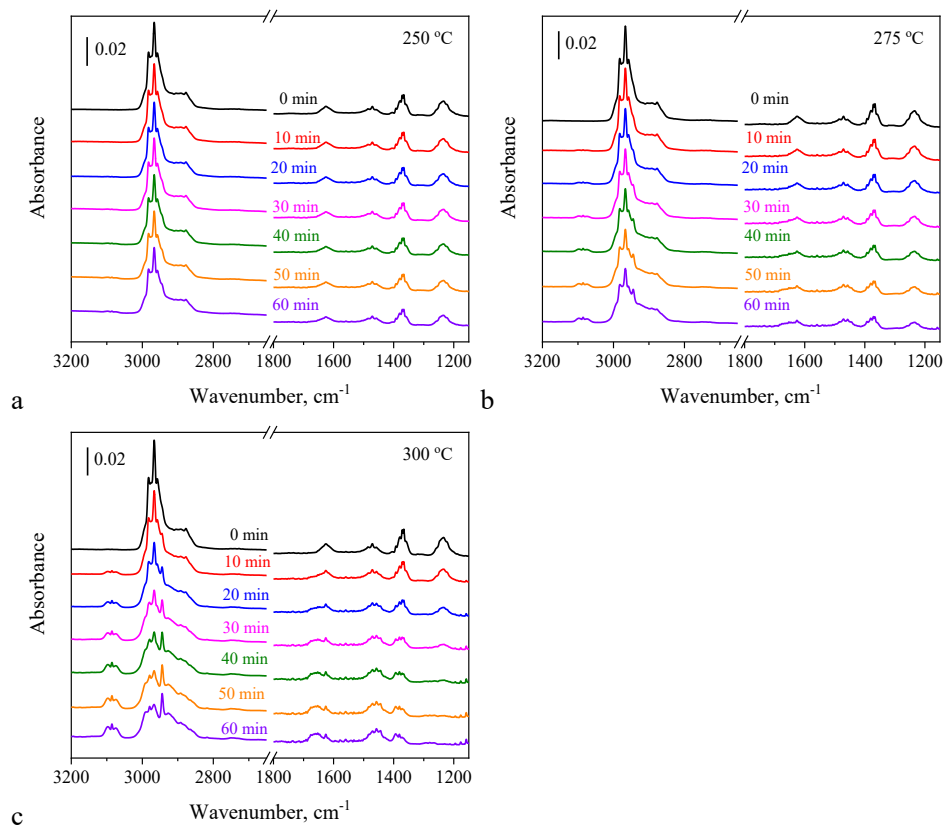

**Fig. S16** In situ FTIR spectra of Hoffman elimination over Ga<sub>0</sub>Al<sub>10</sub>-ZSM-5 at different temperature. (a) 250 °C. (b) 275 °C. (c) 300 °C.

a

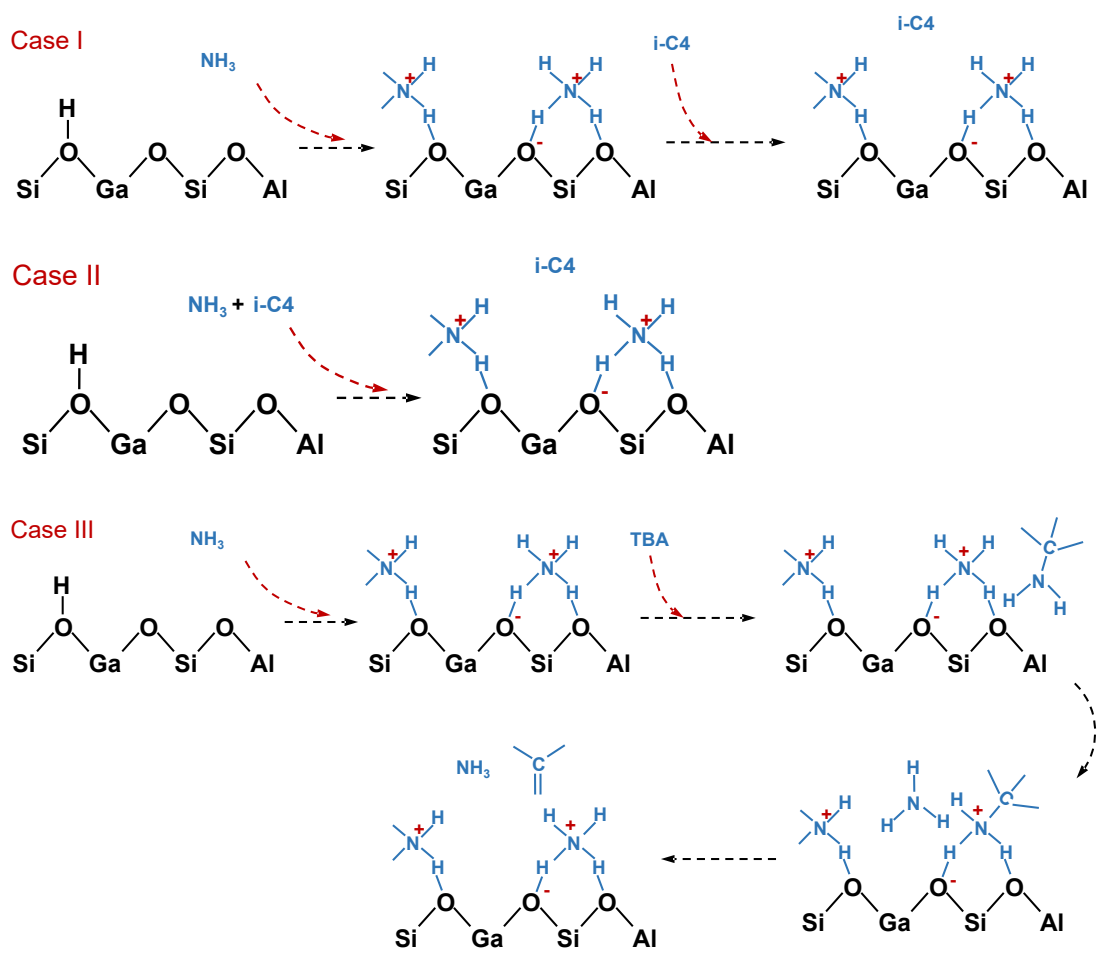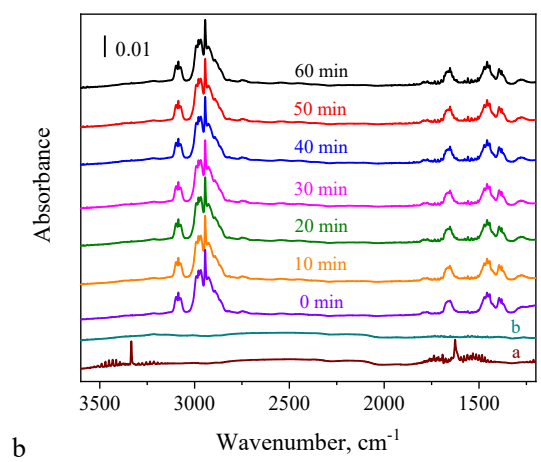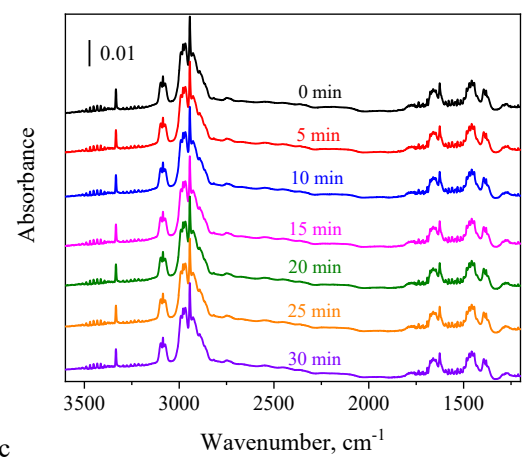

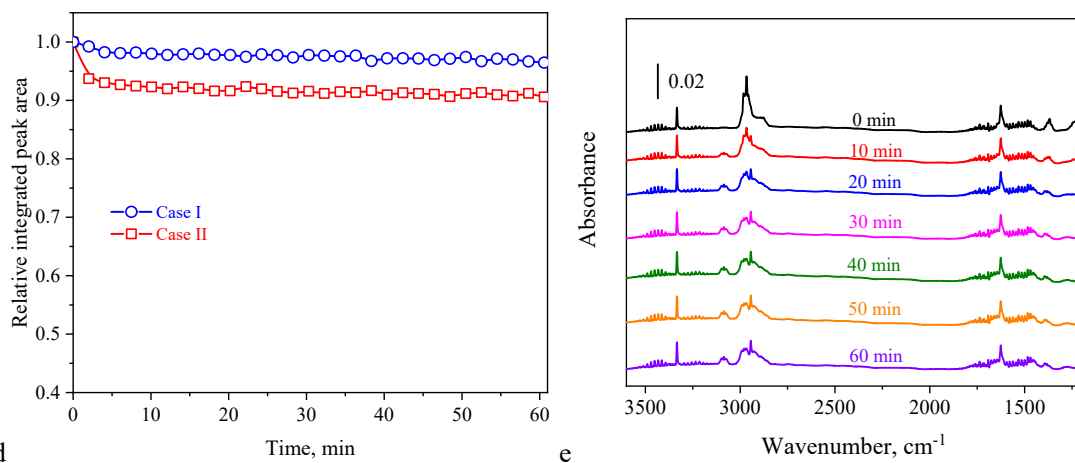

**Fig. S17 Investigation of the relative adsorption stability of the chemicals. (a)** schemes of the cases. **(b)** the in situ FTIR spectra of case I ( $T = 250\text{ }^{\circ}\text{C}$ ). **(c)** the in situ FTIR spectra of case II ( $T = 250\text{ }^{\circ}\text{C}$ ). **(d)** the integrated peak area of band at 3050-3125  $\text{cm}^{-1}$  of case I and II. **(e)** the in situ FTIR spectra of case III ( $T = 300\text{ }^{\circ}\text{C}$ ).

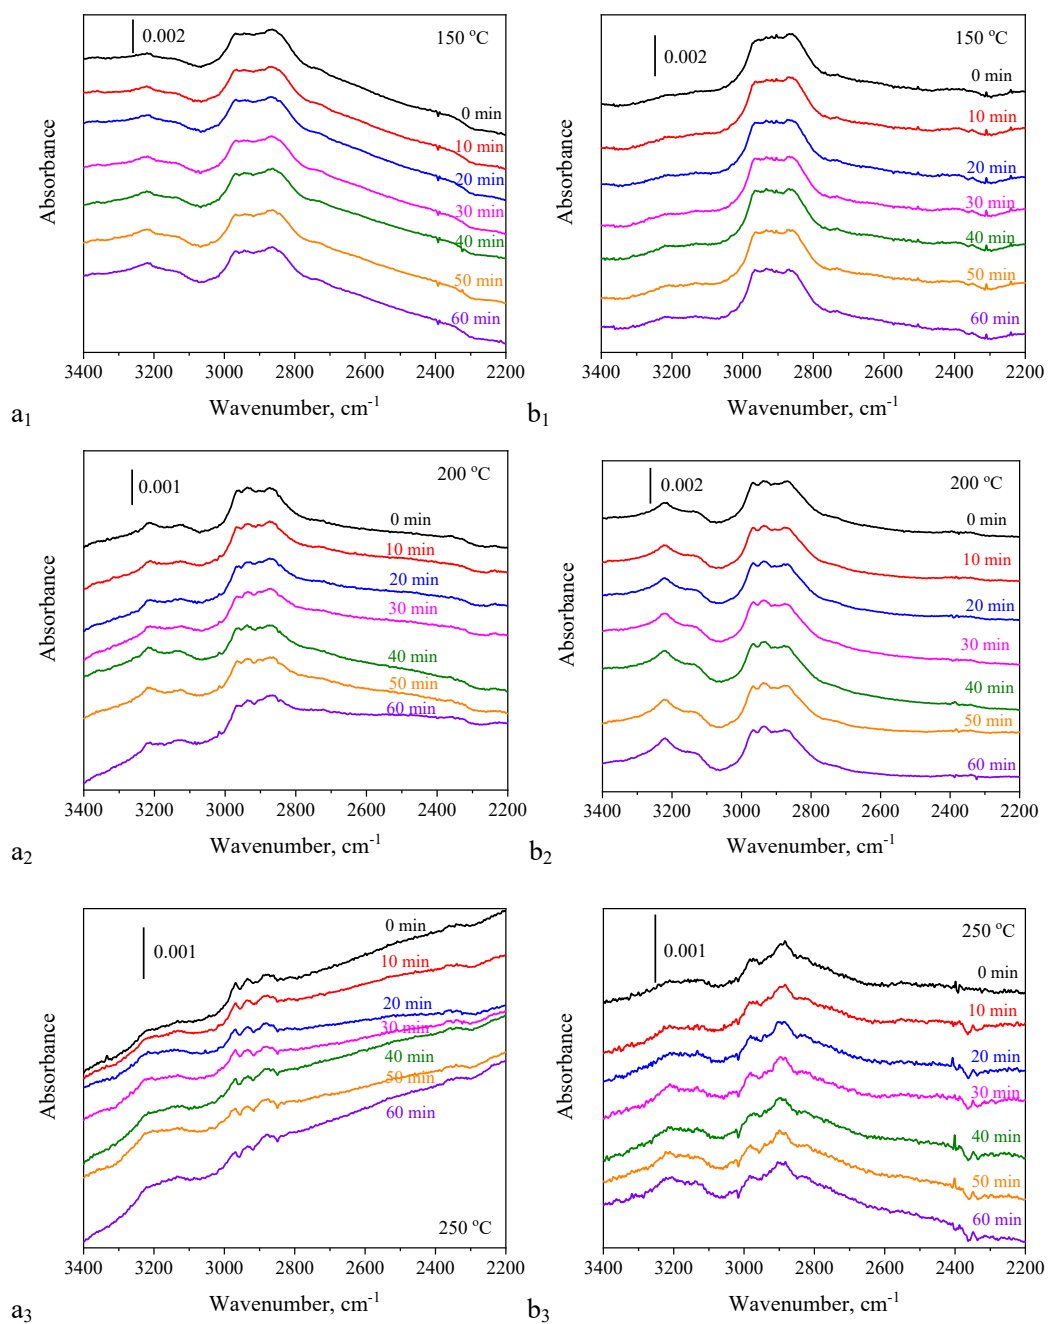

**Fig. S18 In situ FTIR dynamic changes of alkoxide. (a)** under 4 kPa NH<sub>3</sub> atmosphere at 150 °C (a<sub>1</sub>), 200 °C (a<sub>2</sub>), and 250 °C (a<sub>3</sub>). **(b)** under He atmosphere at 150 °C (b<sub>1</sub>), 200 °C (b<sub>2</sub>), and 250 °C (b<sub>3</sub>).

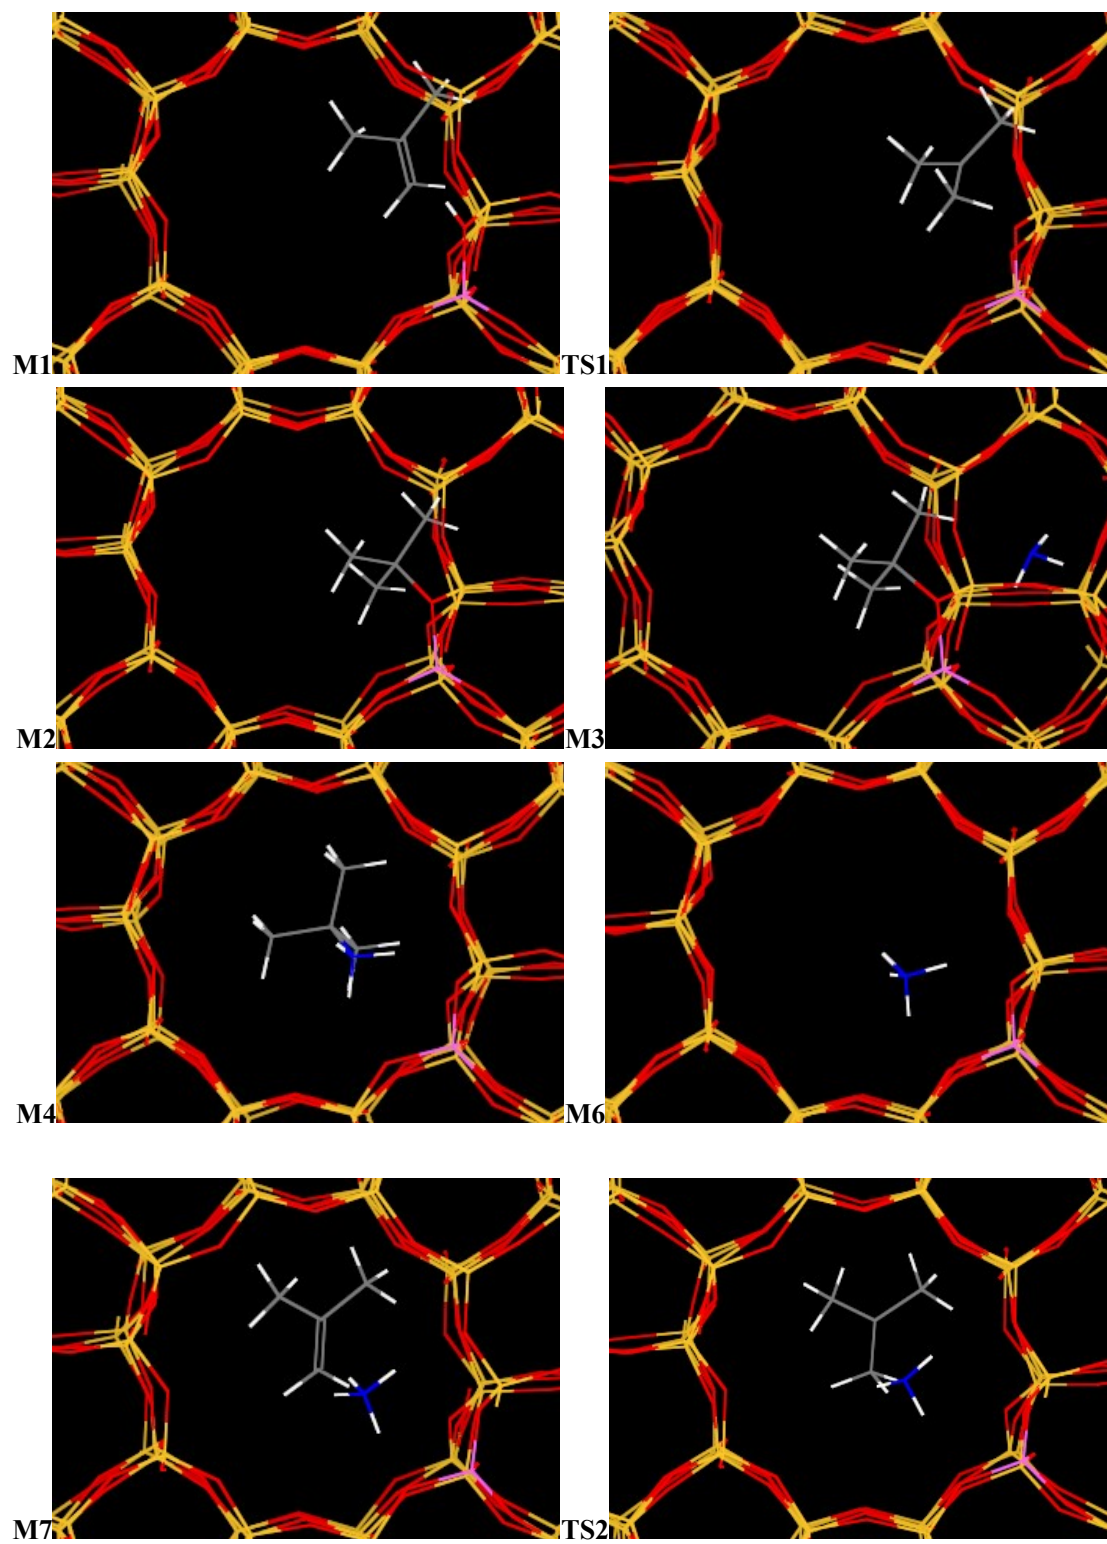



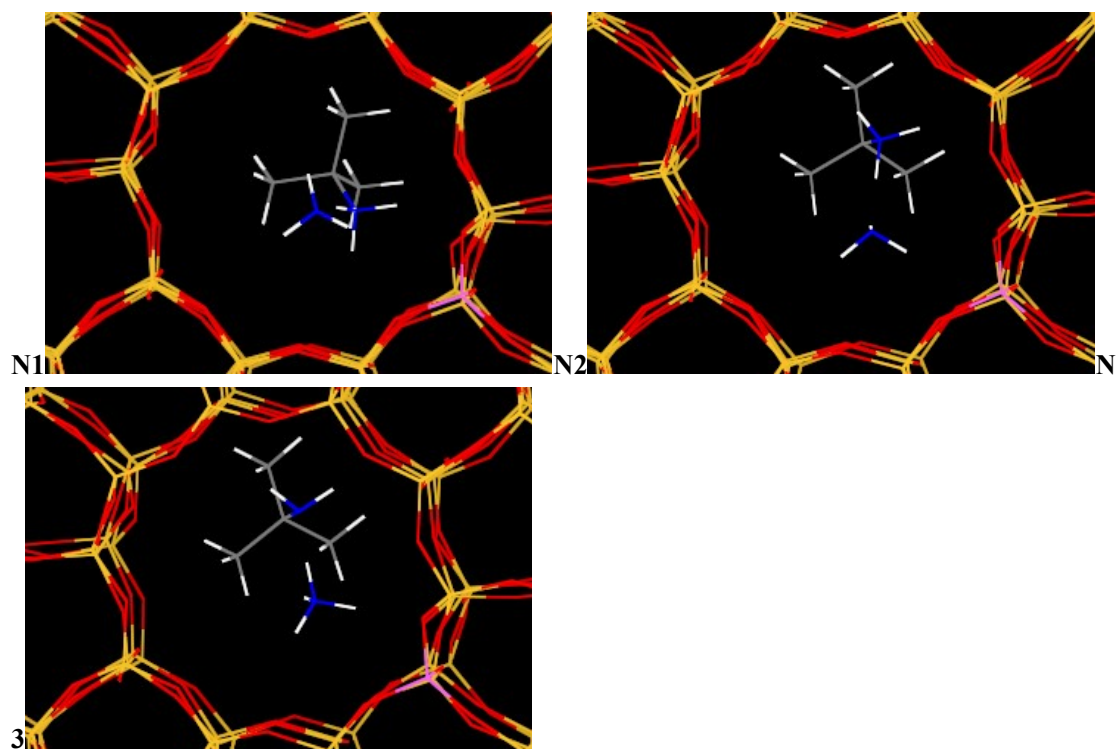

**Fig. S19** Geometry structures of the intermediates along reaction coordinate over ZSM-5.

**Table S1. Characterization of the catalysts.**

| Samples                                 | <sup>a</sup> Si/(Al+Ga) | <sup>b</sup> Surface area, m <sup>2</sup> /g | <sup>c</sup> Acid amount, mmol/g |
|-----------------------------------------|-------------------------|----------------------------------------------|----------------------------------|
| Ga <sub>0</sub> Al <sub>10</sub> -ZSM-5 | 18.1                    | 367                                          | 0.285                            |
| Ga <sub>5</sub> Al <sub>5</sub> -ZSM-5  | 20.2                    | 326                                          | 0.285                            |
| Ga <sub>6</sub> Al <sub>4</sub> -ZSM-5  | 17.5                    | 306                                          | 0.256                            |
| Ga <sub>8</sub> Al <sub>2</sub> -ZSM-5  | 21.0                    | 302                                          | 0.214                            |
| Ga <sub>10</sub> Al <sub>0</sub> -ZSM-5 | 21.3                    | 241                                          | 0.380                            |

<sup>a</sup>. Measured by XRF; <sup>b</sup>. Calculated by BET and t-plot methods; <sup>c</sup>. Mid-strong acid amount measured by NH<sub>3</sub>-TPD between 350 and 650 °C.

**Table S2. Adsorption energy of the chemicals over Al-MFI and Ga-MFI.**

| Model  | NH <sub>3</sub> /eV | IBE/eV | TBA/eV |
|--------|---------------------|--------|--------|
| Ga-12T | -1.43               | -1.08  | -2.48  |
| Al-12T | -1.47               | -1.09  | -2.52  |
